# Supplementary material
Source: PubMed Central journal article supplement (PMC4684756)
Supplement: NIHMS727231-supplement-2.pdf [file NIHMS727231-supplement-2.pdf]

**Supplementary Table 1** Data collection and refinement statistics

|                                                     | pCPA12/<br>H-2L <sup>d</sup> -42F3 | pCPB7/<br>H-2L <sup>d</sup> -42F3 | pCPB9/<br>H-2L <sup>d</sup> -42F3 | pCPC5/<br>H-2L <sup>d</sup> -42F3 | pCPE3/<br>H-2L <sup>d</sup> -42F3       |
|-----------------------------------------------------|------------------------------------|-----------------------------------|-----------------------------------|-----------------------------------|-----------------------------------------|
| <b>Data collection</b>                              |                                    |                                   |                                   |                                   |                                         |
| Space group                                         | <i>P</i> 6 <sub>1</sub> 22         | <i>C</i> 2                        | <i>C</i> 2                        | <i>P</i> 6 <sub>1</sub> 22        | <i>P</i> 3 <sub>1</sub> 21<br>(twinned) |
| Cell dimensions                                     |                                    |                                   |                                   |                                   |                                         |
| <i>a</i> , <i>b</i> , <i>c</i> (Å)                  | 101.6, 101.6,<br>327.1             | 172.8, 60.4,<br>69.7              | 175.3, 60.6,<br>70.1              | 102.7, 102.7,<br>322.9            | 102.5, 102.5,<br>325.7                  |
| $\alpha$ , $\beta$ , $\gamma$ (°)                   | 90, 90, 120                        | 90, 98, 90                        | 90, 96, 90                        | 90, 90, 120                       | 90, 90, 120                             |
| Resolution (Å)                                      | 59.90-3.06<br>(3.169-3.06)         | 34.49-3.09<br>(3.2-3.09)          | 34.85-1.92<br>(2.0-1.92)          | 43.33-2.60<br>(2.69-2.60)         | 59.99-2.90<br>(3.00-2.90)               |
| <i>R</i> <sub>meas</sub> (%)                        | 5.7 (22.2)                         | 8.4 (32.2)                        | 4.4 (24.5)                        | 8.8 (51.9)                        | 6.7 (53.1)                              |
| <i>I</i> / $\sigma$ <i>I</i>                        | 12.0 (4.1)                         | 7.3 (1.7)                         | 8.2 (3.6)                         | 7.9 (2.2)                         | 6.5 (2.5)                               |
| Completeness (%)                                    | 98.9 (99.9)                        | 90.0 (70.0)                       | 94.4 (95.5)                       | 96.7 (98.3)                       | 99.6 (99.3)                             |
| Total reflections                                   | 140668<br>(20823)                  | 66431 (6703)                      | 134780<br>(19908)                 | 166944<br>(24563)                 | 310774<br>(29484)                       |
| Unique reflections                                  | 19619 (2793)                       | 11969 (1283)                      | 53037 (7753)                      | 31125 (4521)                      | 44993 (4385)                            |
| Redundancy                                          | 7.2 (7.5)                          | 5.2 (5.2)                         | 2.6 (2.6)                         | 5.4 (5.4)                         | 6.9 (6.7)                               |
| <b>Refinement</b>                                   |                                    |                                   |                                   |                                   |                                         |
| Resolution (Å)                                      | 59.90-3.06<br>(3.22-3.06)          | 34.49-3.09<br>(3.4-3.09)          | 34.85-1.92<br>(1.957-1.92)        | 43.34-2.60<br>(2.680-2.60)        | 42.81-2.90<br>(2.95-2.90)               |
| <i>R</i> <sub>work</sub> / <i>R</i> <sub>free</sub> | 0.194/ 0.227                       | 0.231/ 0.279                      | 0.180/ 0.219                      | 0.211/ 0.240                      | 0.196/ 0.247                            |
| No. atoms                                           |                                    |                                   |                                   |                                   |                                         |
| Protein                                             | 4947                               | 4933                              | 4835                              | 4952                              | 9790                                    |
| Water                                               | 0                                  | 0                                 | 445                               | 37                                | 0                                       |
| B-factors                                           |                                    |                                   |                                   |                                   |                                         |
| Protein                                             | 66.0                               | 113.4                             | 45.2                              | 86.1                              | 51.8                                    |
| Water                                               |                                    |                                   | 47.3                              | 63.4                              |                                         |
| R.m.s deviations                                    |                                    |                                   |                                   |                                   |                                         |
| Bond lengths (Å)                                    | 0.005                              | 0.002                             | 0.016                             | 0.003                             | 0.006                                   |
| Bond angles (°)                                     | 0.87                               | 0.63                              | 1.58                              | 0.77                              | 0.96                                    |
| Ramachandran<br>favored (%)                         | 96                                 | 96                                | 97                                | 97                                | 95                                      |
| Ramachandran<br>outliers (%)                        | 0                                  | 0.16                              | 0.17                              | 0                                 | 0                                       |
| PDB accession code                                  | 4N5E                               | 4MVB                              | 4MS8                              | 4MXQ                              | 4N0C                                    |

\*Highest resolution shell is shown in parenthesis.

**Supplementary Table 2.** TCR-pMHC Nomenclature

| PBD  | Peptide Clone | Peptide   | Source*          | TCR    | MHC               |
|------|---------------|-----------|------------------|--------|-------------------|
| 3TF7 | QL9           | QLSPFPFDL | Mouse            | 42F3   | H-2L <sup>d</sup> |
| 3TFK | p4B10         | QLSDVPMDL | Yeast Library 4  | 42F3   | H-2L <sup>d</sup> |
| 3TPU | p5E8          | FLSPFWFDI | Yeast Library 5  | 42F3   | H-2L <sup>d</sup> |
| 4N5E | pCPA12        | VPYMAEFGM | Yeast Library CP | 42F3   | H-2L <sup>d</sup> |
| 4MXQ | pCPC5         | SPAPRPLDL | Yeast Library CP | 42F3   | H-2L <sup>d</sup> |
| 4N0C | pCPE3         | MPAGRPWDL | Yeast Library CP | 42F3   | H-2L <sup>d</sup> |
| 4MVB | pCPB7         | WPAEGGFQL | Yeast Library CP | 42F3   | H-2L <sup>d</sup> |
| 4MS8 | pCPB9         | SPAEAGFFL | Yeast Library CP | 42F3   | H-2L <sup>d</sup> |
| 3TJH | p3A1          | SPLDSLWWI | Yeast Library 3  | 42F3   | H-2L <sup>d</sup> |
| 2O19 | QL9           | QLSPFPFDL | Mouse            | 2C     | H-2L <sup>d</sup> |
| 3E3Q | QL9           | QLSPFPFDL | Mouse            | 2C-m13 | H-2L <sup>d</sup> |
| 3E2H | QL9           | QLSPFPFDL | Mouse            | 2C-m67 | H-2L <sup>d</sup> |
| 2E7L | QL9           | QLSPFPFDL | Mouse            | 2C-m6  | H-2L <sup>d</sup> |
| -    | MCMV          | YPHFMPDNL | Virus            | -      | H-2L <sup>d</sup> |

\* Yeast Libraries 3-5 were previously described (Adams et al Immunity 2011)
